# Supplementary material for: Classification and Computational Analysis of Arabidopsis thaliana Sperm Cell-Specific F-Box Protein Gene 3p.AtFBP113
Source: Front Genet. 2020 Dec 14;11:609668. doi: 10.3389/fgene.2020.609668 (PMC7767997; doi:10.3389/fgene.2020.609668)
Supplement: Supplementary Table 1 — The proposed nomenclature of Arabidopsis thaliana F-box protein gene family. [file Table_1.XLSX]

## Sheet: Sheet1
Table S1: The proposed nomenclature of Arabidopsis thaliana F-box protein gene family
Gene IDs	Gene Coordinates	Gene Length	Chromosome No.	Chromosome Arm	Porposed Nomenclature
At1g05080	1459091..1460579	1489	1	p	1p.AtFBP1
At1g06110	1853059..1855378	2320	1	p	1p.AtFBP2
At1g06630	2027606..2031388	3786	1	p	1p.AtFBP3
At1g08710	2771620..2773531	1912	1	p	1p.AtFBP4
At1g09650	3125175..3127284	2110	1	p	1p.AtFBP5
At1g10110	3302564..3303938	1375	1	p	1p.AtFBP6
At1g10780	3592680..3595220	2541	1	p	1p.AtFBP7
At1g10890	3627646..3630808	3163	1	p	1p.AtFBP8
At1g11270	3780386..3787099	6714	1	p	1p.AtFBP9
At1g11620	3910833..3911924	1092	1	p	1p.AtFBP10
At1g11810	3989763..3991066	1304	1	p	1p.AtFBP11
At1g12170	4128607..4129701	1095	1	p	1p.AtFBP12
At1g12190	4132967..4134094	1128	1	p	1p.AtFBP13
At1g12710	4326739..4328616	1878	1	p	1p.AtFBP14
At1g12820	4368760..4371298	2539	1	p	1p.AtFBP15
At1g12860	4384304..4386651	2348	1	p	1p.AtFBP16
At1g12870	4387129..4389110	1982	1	p	1p.AtFBP17
At1g13200	4507221..4508528	1308	1	p	1p.AtFBP18
At1g13570	4642124..4644422	2299	1	p	1p.AtFBP19
At1g13780	4724544..4726558	2015	1	p	1p.AtFBP20
At1g14330	4890069..4892332	2264	1	p	1p.AtFBP21
At1g14315	4886768..4887933	1166	1	p	1p.AtFBP22
At1g15015	5172081..5172923	843	1	p	1p.AtFBP23
At1g15670	5389952..5391672	1721	1	p	1p.AtFBP24
At1g15680	5393407..5394639	1233	1	p	1p.AtFBP25
At1g16250	5556964..5559520	2557	1	p	1p.AtFBP26
At1g16930	5789679..5791752	2074	1	p	1p.AtFBP27
At1g16940	5791983..5793491	1509	1	p	1p.AtFBP28
At1g19070	6584454..6584705	252	1	p	1p.AtFBP29
At1g19160	6614087..6615214	1128	1	p	1p.AtFBP30
At1g19460	6738484..6739734	1251	1	p	1p.AtFBP31
At1g19470	6741296..6742534	1239	1	p	1p.AtFBP32
At1g19930	6917020..6918138	1119	1	p	1p.AtFBP33
At1g20657	7161846..7163686	1841	1	p	1p.AtFBP34
At1g20790	7220880..7222432	1553	1	p	1p.AtFBP35
At1g20795	7226310..7227566	1257	1	p	1p.AtFBP36
At1g20800	7228718..7230240	1523	1	p	1p.AtFBP37
At1g20940	7295274..7296518	1245	1	p	1p.AtFBP38
At1g21410	7496998..7499616	2619	1	p	1p.AtFBP39
At1g21760	7649194..7651816	2623	1	p	1p.AtFBP40
At1g21990	7740530..7742106	1577	1	p	1p.AtFBP41
At1g22000	7744094..7745744	1651	1	p	1p.AtFBP42
At1g22040	7767924..7770216	2293	1	p	1p.AtFBP43
At1g22220	7846459..7847836	1378	1	p	1p.AtFBP44
At1g23390	8308965..8310916	1952	1	p	1p.AtFBP45
At1g23770	8405214..8406266	1053	1	p	1p.AtFBP46
At1g23780	8406663..8408530	1868	1	p	1p.AtFBP47
At1g24793	8767562..8769571	2010	1	p	1p.AtFBP48
At1g24880	8775901..8778072	2886	1	p	1p.AtFBP49
At1g25141	8817678..8818395	718	1	p	1p.AtFBP50
At1g25280	8863768..8866894	3127	1	p	1p.AtFBP51
At1g26510	9159851..9161044	1194	1	p	1p.AtFBP52
At1g26930	9336057..9337938	1882	1	p	1p.AtFBP53
At1g27340	9495344..9498085	2742	1	p	1p.AtFBP54
At1g27420	9519067..9520716	1650	1	p	1p.AtFBP55
At1g27490	9546373..9547073	701	1	p	1p.AtFBP56
At1g30090	10559496..10561545	2050	1	p	1p.AtFBP57
At1g30200	10625000..10627135	2136	1	p	1p.AtFBP58
At1g30780	10923919..10926561	2643	1	p	1p.AtFBP59
At1g30790	10932713..10934066	1354	1	p	1p.AtFBP60
At1g30920	11004084..11005444	1361	1	p	1p.AtFBP61
At1g30925	11009888..11012280	2393	1	p	1p.AtFBP62
At1g30930	11014783..11015913	1131	1	p	1p.AtFBP63
At1g30935	11017603..11019048	1446	1	p	1p.AtFBP64
At1g30945	11026338..11026784	447	1	p	1p.AtFBP65
At1g30950	11035992..11037508	1517	1	p	1p.AtFBP66
At1g31000	11053377..11054567	1191	1	p	1p.AtFBP67
At1g31072	11089491..11089925	435	1	p	1p.AtFBP68
At1g31080	11091832..11092899	1068	1	p	1p.AtFBP69
At1g31090	11094407..11095649	1243	1	p	1p.AtFBP70
At1g31350	11221267..11222827	1561	1	p	1p.AtFBP71
At1g32020	11512552..11513067	516	1	p	1p.AtFBP72
At1g32140	11562742..11564833	2092	1	p	1p.AtFBP73
At1g32375	11678886..11680839	1954	1	p	1p.AtFBP74
At1g32420	11701995..11702903	909	1	p	1p.AtFBP75
At1g32430	11704932..11706357	1426	1	p	1p.AtFBP76
At1g32660	11811040..11812380	1341	1	p	1p.AtFBP77
At1g33010	11959287..11960591	1305	1	p	1p.AtFBP78
At1g33020	11962746..11964832	2087	1	p	1p.AtFBP79
At1g33530	12159884..12161314	1431	1	p	1p.AtFBP80
At1g36030	13436586..13436828	243	1	p	1p.AtFBP81
At1g43640	16439367..16441941	2575	1	q	1q.AtFBP82
At1g44080	16753944..16755670	1727	1	q	1q.AtFBP83
At1g46840	17270185..17271706	1522	1	q	1q.AtFBP84
At1g46984	17274722..17275834	1113	1	q	1q.AtFBP85
At1g47056	17275890..17277839	1950	1	q	1q.AtFBP86
At1g47270	17326530..17328772	2243	1	q	1q.AtFBP87
At1g47300	17339561..17340972	1412	1	q	1q.AtFBP88
At1g47340	17353847..17356564	2718	1	q	1q.AtFBP89
At1g47390	17379544..17380656	1113	1	q	1q.AtFBP90
At1g47730	17563931..17565106	1176	1	q	1q.AtFBP91
At1g47765	17574906..17576092	1187	1	q	1q.AtFBP92
At1g47790	17600004..17601173	1170	1	q	1q.AtFBP93
At1g47800	17601513..17602676	1164	1	q	1q.AtFBP94
At1g47810	17603504..17604559	1056	1	q	1q.AtFBP95
At1g47915	17660752..17661058	307	1	q	1q.AtFBP96
At1g48060	17728095..17729102	1008	1	q	1q.AtFBP97
At1g48400	17881968..17883967	2000	1	q	1q.AtFBP98
At1g48625	17979561..17980815	1255	1	q	1q.AtFBP99
At1g49360	18267231..18269465	2235	1	q	1q.AtFBP100
At1g49610	18361679..18363192	1514	1	q	1q.AtFBP101
At1g49990	18513624..18515099	1476	1	q	1q.AtFBP102
At1g50870	18855147..18856337	1191	1	q	1q.AtFBP103
At1g50880	18860837..18861982	1146	1	q	1q.AtFBP104
At1g50980	18900541..18902057	1517	1	q	1q.AtFBP105
At1g51290	19012173..19013306	1134	1	q	1q.AtFBP106
At1g51320	19025642..19026769	1128	1	q	1q.AtFBP107
At1g51370	19045059..19047518	2460	1	q	1q.AtFBP108
At1g51550	19117032..19119382	2351	1	q	1q.AtFBP109
At1g52490	19556218..19556945	728	1	q	1q.AtFBP110
At1g52650	19610856..19612417	1562	1	q	1q.AtFBP111
At1g53320	19890935..19893504	2570	1	q	1q.AtFBP112
At1g53370	19910516..19911646	1131	1	q	1q.AtFBP113
At1g53550	19983411..19984637	1227	1	q	1q.AtFBP114
At1g53790	20079081..20081464	2384	1	q	1q.AtFBP115
At1g54550	20369651..20370986	1336	1	q	1q.AtFBP116
At1g55000	20514634..20516558	1925	1	q	1q.AtFBP117
At1g55030	20530417..20532151	1735	1	q	1q.AtFBP118
At1g55070	20551452..20552633	1182	1	q	1q.AtFBP119
At1g55270	20617954..20620146	2193	1	q	1q.AtFBP120
At1g55590	20769300..20771880	2581	1	q	1q.AtFBP121
At1g55660	20800694..20802377	1684	1	q	1q.AtFBP122
At1g56240	21056099..21057577	1479	1	q	1q.AtFBP123
At1g56250	21061522..21063047	1526	1	q	1q.AtFBP124
At1g56400	21111727..21113621	1895	1	q	1q.AtFBP125
At1g56610	21211719..21214562	2844	1	q	1q.AtFBP126
At1g57580	21325079..21326252	1174	1	q	1q.AtFBP127
At1g57690	21366721..21368150	1430	1	q	1q.AtFBP128
At1g57790	21404342..21405956	1615	1	q	1q.AtFBP129
At1g58090	21510510..21511625	1116	1	q	1q.AtFBP130
At1g58310	21631947..21633642	1696	1	q	1q.AtFBP131
At1g59675	21931833..21932403	571	1	q	1q.AtFBP132
At1g59680	21933012..21934216	1205	1	q	1q.AtFBP133
At1g60370	22244963..22245814	852	1	q	1q.AtFBP134
At1g60400	22254405..22255798	1394	1	q	1q.AtFBP135
At1g60410	22258939..22260787	1849	1	q	1q.AtFBP136
At1g60570	22311836..22312981	1146	1	q	1q.AtFBP137
At1g61060	22488548..22489711	1164	1	q	1q.AtFBP138
At1g61320	22617370..22619853	2484	1	q	1q.AtFBP139
At1g61330	22622975..22624527	1553	1	q	1q.AtFBP140
At1g61340	22628264..22630020	1757	1	q	1q.AtFBP141
At1g61540	22702498..22703706	1209	1	q	1q.AtFBP142
At1g61940	22897399..22898725	1327	1	q	1q.AtFBP143
At1g62270	23004499..23005650	1152	1	q	1q.AtFBP144
At1g63090	23390968..23392873	1906	1	q	1q.AtFBP145
At1g64540	23966684..23968512	1829	1	q	1q.AtFBP146
At1g64840	24093496..24095485	1990	1	q	1q.AtFBP147
At1g65740	24452096..24453211	1116	1	q	1q.AtFBP148
At1g65760	24458591..24459715	1125	1	q	1q.AtFBP149
At1g65770	24460656..24461738	1083	1	q	1q.AtFBP150
At1g65990	24571603..24573471	1869	1	q	1q.AtFBP151
At1g66290	24713306..24714843	1538	1	q	1q.AtFBP152
At1g66300	24716305..24718050	1746	1	q	1q.AtFBP153
At1g66310	24722971..24724475	1505	1	q	1q.AtFBP154
At1g66320	24726812..24728637	1826	1	q	1q.AtFBP155
At1g66490	24809421..24810549	1129	1	q	1q.AtFBP156
At1g67130	25099262..25100625	1364	1	q	1q.AtFBP157
At1g67160	25124819..25127098	2280	1	q	1q.AtFBP158
At1g67190	25132498..25134470	1973	1	q	1q.AtFBP159
At1g67340	25230239..25231943	1705	1	q	1q.AtFBP160
At1g67390	25244690..25247343	2654	1	q	1q.AtFBP161
At1g67450	25266163..25267359	1196	1	q	1q.AtFBP162
At1g67455	25267925..25269475	1551	1	q	1q.AtFBP163
At1g67480	25276183..25278780	2598	1	q	1q.AtFBP164
At1g67623	25342101..25343243	1143	1	q	1q.AtFBP165
At1g68050	25508639..25510907	2269	1	q	1q.AtFBP166
At1g69090	25977450..25978706	1257	1	q	1q.AtFBP167
At1g69630	26191472..26193174	1703	1	q	1q.AtFBP168
At1g70360	26508486..26509325	840	1	q	1q.AtFBP169
At1g70380	26526212..26527345	1134	1	q	1q.AtFBP170
At1g70390	26529171..26530282	1112	1	q	1q.AtFBP171
At1g70590	26618099..26620421	2323	1	q	1q.AtFBP172
At1g70960	26756253..26757362	1110	1	q	1q.AtFBP173
At1g70970	26759834..26761042	1209	1	q	1q.AtFBP174
At1g71320	26882485..26883818	1334	1	q	1q.AtFBP175
At1g74510	28005264..28007748	2485	1	q	1q.AtFBP176
At1g76830	28844644..28845905	1262	1	q	1q.AtFBP177
At1g76900	28881539..28885023	3485	1	q	1q.AtFBP178
At1g76920	28891976..28893721	1746	1	q	1q.AtFBP179
At1g77000	28940147..28942639	2493	1	q	1q.AtFBP180
At1g77650	29181110..29182261	1152	1	q	1q.AtFBP181
At1g77880	29285902..29287190	1289	1	q	1q.AtFBP182
At1g78100	29387672..29389222	1551	1	q	1q.AtFBP183
At1g78280	29452555..29457373	4819	1	q	1q.AtFBP184
At1g78730	29607689..29609441	1753	1	q	1q.AtFBP185
At1g78750	29612904..29614884	1981	1	q	1q.AtFBP186
At1g78760	29615096..29616738	1643	1	q	1q.AtFBP187
At1g78840	29639290..29641018	1729	1	q	1q.AtFBP188
At1g80440	30241452..30243176	1725	1	q	1q.AtFBP189
At1g80470	30256065..30258032	1968	1	q	1q.AtFBP190
At1g80570	30290325..30292420	2096	1	q	1q.AtFBP191
At1g80960	30415123..30419047	3925	1	q	1q.AtFBP192
At2g01620	278124..279296	1173	2	p	2p.AtFBP1
At2g02030	482335..483829	1495	2	p	2p.AtFBP2
At2g02230	589945..591689	1745	2	p	2p.AtFBP3
At2g02250	594484..595869	1386	2	p	2p.AtFBP4
At2g02270	598112..599525	1414	2	p	2p.AtFBP5
At2g02300	606182..607919	1738	2	p	2p.AtFBP6
At2g02310	608586..610283	1698	2	p	2p.AtFBP7
At2g02320	610428..611843	1416	2	p	2p.AtFBP8
At2g02340	616088..617322	1235	2	p	2p.AtFBP9
At2g02350	617414..619138	1725	2	p	2p.AtFBP10
At2g02360	619323..620793	1471	2	p	2p.AtFBP11
At2g02660	738504..739834	1331	2	p	2p.AtFBP12
At2g02870	837801..840398	2598	2	p	2p.AtFBP13
At2g02890	843913..846616	2704	2	p	2p.AtFBP14
At2g03560	1079639..1080826	1188	2	p	2p.AtFBP15
At2g03610	1099070..1100202	1133	2	p	2p.AtFBP16
At2g04230	1446795..1449100	2306	2	p	2p.AtFBP17
At2g04810	1688773..1689966	1194	2	p	2p.AtFBP18
At2g04840	1697009..1698240	1232	2	p	2p.AtFBP19
At2g04920	1726138..1727268	1131	2	p	2p.AtFBP20
At2g05300	1930926..1933000	2075	2	p	2p.AtFBP21
At2g05970	2308651..2309784	1134	2	p	2p.AtFBP22
At2g11200	4451924..4452388	465	2	q	2q.AtFBP23
At2g13130	5418680..5420852	2173	2	q	2q.AtFBP24
At2g14290	6057288..6058620	1333	2	q	2q.AtFBP25
At2g14500	6166936..6167979	1044	2	q	2q.AtFBP26
At2g14710	6298679..6300150	1472	2	q	2q.AtFBP27
At2g15640	6816541..6818358	1818	2	q	2q.AtFBP28
At2g16220	7030155..7031378	1224	2	q	2q.AtFBP29
At2g16290	7058930..7060573	1644	2	q	2q.AtFBP30
At2g16300	7061629..7063367	1739	2	q	2q.AtFBP31
At2g16365	7074119..7079519	5401	2	q	2q.AtFBP32
At2g16450	7131391..7132803	1413	2	q	2q.AtFBP33
At2g16810	7287412..7288945	1534	2	q	2q.AtFBP34
At2g17020	7396281..7398885	2605	2	q	2q.AtFBP35
At2g17030	7399056..7400970	1915	2	q	2q.AtFBP36
At2g17036	7403693..7405262	1570	2	q	2q.AtFBP37
At2g17310	7531194..7532412	1219	2	q	2q.AtFBP38
At2g17690	7682162..7684083	1922	2	q	2q.AtFBP39
At2g17830	7754048..7755604	1557	2	q	2q.AtFBP40
At2g18280	7945998..7948468	2471	2	q	2q.AtFBP41
At2g18780	8136740..8138142	1403	2	q	2q.AtFBP42
At2g18915	8194512..8197483	2972	2	q	2q.AtFBP43
At2g19630	8490181..8491110	930	2	q	2q.AtFBP44
At2g20380	8794818..8795980	1163	2	q	2q.AtFBP45
At2g21680	9267730..9269019	1290	2	q	2q.AtFBP46
At2g21930	9347641..9349178	1538	2	q	2q.AtFBP47
At2g21950	9353174..9354645	1472	2	q	2q.AtFBP48
At2g22030	9372530..9373681	1152	2	q	2q.AtFBP49
At2g22050	9376684..9377862	1179	2	q	2q.AtFBP50
At2g22710	9651719..9654532	2814	2	q	2q.AtFBP51
At2g23160	9862470..9863744	1275	2	q	2q.AtFBP52
At2g23880	10165992..10170262	4271	2	q	2q.AtFBP53
At2g24250	10313066..10314985	1920	2	q	2q.AtFBP54
At2g24510	10404373..10405650	1278	2	q	2q.AtFBP55
At2g24540	10426342..10427683	1253	2	q	2q.AtFBP56
At2g25490	10847375..10850797	3423	2	q	2q.AtFBP57
At2g26030	11091330..11093444	2115	2	q	2q.AtFBP58
At2g26160	11137978..11139451	1474	2	q	2q.AtFBP59
At2g26850	11448976..11451270	2295	2	q	2q.AtFBP60
At2g26860	11451950..11453947	1998	2	q	2q.AtFBP61
At2g27310	11683772..11685342	1571	2	q	2q.AtFBP62
At2g27505	11756566..11757898	1333	2	q	2q.AtFBP63
At2g27520	11762061..11763143	1083	2	q	2q.AtFBP64
At2g29600	12655151..12657296	2146	2	q	2q.AtFBP65
At2g29610	12661312..12662417	1106	2	q	2q.AtFBP66
At2g29770	12715411..12716875	1465	2	q	2q.AtFBP67
At2g29780	12717786..12719328	1543	2	q	2q.AtFBP68
At2g29800	12722939..12724602	1664	2	q	2q.AtFBP69
At2g29810	12726102..12727253	1152	2	q	2q.AtFBP70
At2g29820	12728362..12729528	1167	2	q	2q.AtFBP71
At2g29830	12730411..12731599	1189	2	q	2q.AtFBP72
At2g29860	12737666..12738388	723	2	q	2q.AtFBP73
At2g29910	12751147..12753241	2095	2	q	2q.AtFBP74
At2g29930	12756326..12758558	2233	2	q	2q.AtFBP75
At2g31470	13407380..13408720	1341	2	q	2q.AtFBP76
At2g32560	13824663..13827260	2598	2	q	2q.AtFBP77
At2g33190	14067866..14069149	1284	2	q	2q.AtFBP78
At2g33200	14069541..14070671	1131	2	q	2q.AtFBP79
At2g33655	14242915..14244569	1655	2	q	2q.AtFBP80
At2g34280	14470201..14471837	1637	2	q	2q.AtFBP81
At2g35280	14859378..14860200	823	2	q	2q.AtFBP82
At2g36090	15158561..15159639	1079	2	q	2q.AtFBP83
At2g38590	16142897..16144184	1288	2	q	2q.AtFBP84
At2g39490	16486902..16488645	1744	2	q	2q.AtFBP85
At2g39940	16672493..16675864	3372	2	q	2q.AtFBP86
At2g40920	17072352..17074175	1824	2	q	2q.AtFBP87
At2g40925	17074905..17076239	1335	2	q	2q.AtFBP88
At2g41170	17159074..17161294	2221	2	q	2q.AtFBP89
At2g41360	17234057..17236385	2329	2	q	2q.AtFBP90
At2g42620	17756069..17758468	2400	2	q	2q.AtFBP91
At2g42720	17785354..17787421	2068	2	q	2q.AtFBP92
At2g42730	17789404..17791582	2179	2	q	2q.AtFBP93
At2g43260	17983506..17985185	1680	2	q	2q.AtFBP94
At2g43270	17988175..17989491	1317	2	q	2q.AtFBP95
At2g43440	18039306..18040732	1427	2	q	2q.AtFBP96
At2g44030	18220086..18221228	1143	2	q	2q.AtFBP97
At2g44130	18253610..18255054	1445	2	q	2q.AtFBP98
At2g44630	18415596..18417013	1418	2	q	2q.AtFBP99
At2g44700	18431006..18432333	1328	2	q	2q.AtFBP100
At2g44900	18511313..18516468	5156	2	q	2q.AtFBP101
At2g47900	19610923..19613325	2403	2	q	2q.AtFBP102
At3g03030	682054..684083	2030	3	q	3q.AtFBP1
At3g03040	684389..686639	2251	3	q	3q.AtFBP2
At3g03360	794906..797013	2108	3	q	3q.AtFBP3
At3g03730	935139..936320	1182	3	q	3q.AtFBP4
At3g04660	1264724..1265966	1243	3	q	3q.AtFBP5
At3g06240	1887043..1888807	1765	3	q	3q.AtFBP6
At3g06380	1936050..1938257	2208	3	q	3q.AtFBP7
At3g06570	2047219..2048553	1335	3	q	3q.AtFBP8
At3g07550	2409477..2411329	1853	3	q	3q.AtFBP9
At3g07870	2510570..2512479	1910	3	q	3q.AtFBP10
At3g08750	2656716..2657825	1110	3	q	3q.AtFBP11
At3g08810	2675470..2676708	1239	3	q	3q.AtFBP12
At3g10240	3166698..3167867	1170	3	q	3q.AtFBP13
At3g10430	3242750..3243862	1113	3	q	3q.AtFBP14
At3g10510	3274220..3275551	1332	3	q	3q.AtFBP15
At3g10790	3377410..3378369	960	3	q	3q.AtFBP16
At3g12350	3931451..3933404	1954	3	q	3q.AtFBP17
At3g12840	4085431..4085970	540	3	q	3q.AtFBP18
At3g13680	4477289..4478751	1463	3	q	3q.AtFBP19
At3g13820	4549616..4551011	1396	3	q	3q.AtFBP20
At3g13830	4553943..4555076	1134	3	q	3q.AtFBP21
At3g14710	4941481..4943064	1584	3	q	3q.AtFBP22
At3g16210	5494480..5495725	1246	3	q	3q.AtFBP23
At3g16555	5633426..5634542	1117	3	q	3q.AtFBP24
At3g16580	5647376..5648746	1371	3	q	3q.AtFBP25
At3g16590	5649932..5651056	1125	3	q	3q.AtFBP26
At3g16740	5699310..5700991	1682	3	q	3q.AtFBP27
At3g16820	5728016..5729174	1159	3	q	3q.AtFBP28
At3g16880	5766733..5767830	1098	3	q	3q.AtFBP29
At3g17265	5899515..5900637	1123	3	q	3q.AtFBP30
At3g17270	5902479..5902886	408	3	q	3q.AtFBP31
At3g17280	5902935..5904644	1710	3	q	3q.AtFBP32
At3g17320	915427..5916656	1230	3	q	3q.AtFBP33
At3g17400	5954887..5955444	558	3	q	3q.AtFBP34
At3g17480	5983196..5984320	1125	3	q	3q.AtFBP35
At3g17490	5984827..5985993	1167	3	q	3q.AtFBP36
At3g17500	5986682..5988498	1817	3	q	3q.AtFBP37
At3g17530	6000860..6002282	1423	3	q	3q.AtFBP38
At3g17540	6002783..6003973	1191	3	q	3q.AtFBP39
At3g17560	6006762..6008003	1242	3	q	3q.AtFBP40
At3g17570	6009407..6010562	1156	3	q	3q.AtFBP41
At3g17620	6026446..6027694	1249	3	q	3q.AtFBP42
At3g17710	6055495..6056778	1284	3	q	3q.AtFBP43
At3g18320	6289039..6290401	1363	3	q	3q.AtFBP44
At3g18330	6291058..6292320	1263	3	q	3q.AtFBP45
At3g18340	6294018..6295134	1117	3	q	3q.AtFBP46
At3g18720	6444367..6445808	1442	3	q	3q.AtFBP47
At3g18910	6521569..6523061	1493	3	q	3q.AtFBP48
At3g18980	6546200..6548092	1893	3	q	3q.AtFBP49
At3g19410	6729585..6730706	1122	3	q	3q.AtFBP50
At3g19470	6749432..6751083	1652	3	q	3q.AtFBP51
At3g19560	6793311..6794802	1492	3	q	3q.AtFBP52
At3g19880	6911435..6912604	1170	3	q	3q.AtFBP53
At3g19890	6914910..6916142	1233	3	q	3q.AtFBP54
At3g20030	6990254..6991462	1029	3	q	3q.AtFBP55
At3g20270	7067057..7071039	3983	3	q	3q.AtFBP56
At3g20690	7231570..7232682	1113	3	q	3q.AtFBP57
At3g20710	7237818..7239149	1332	3	q	3q.AtFBP58
At3g21120	7406326..7407429	1104	3	q	3q.AtFBP59
At3g21130	7408246..7409349	1104	3	q	3q.AtFBP60
At3g21170	7419917..7421366	1450	3	q	3q.AtFBP61
At3g21410	7536719..7537951	1233	3	q	3q.AtFBP62
At3g22350	7901905..7903041	1137	3	q	3q.AtFBP63
At3g22421	7949106..7950440	1335	3	q	3q.AtFBP64
At3g22650	8014809..8015960	1152	3	q	3q.AtFBP65
At3g22700	8024794..8025906	1113	3	q	3q.AtFBP66
At3g22710	8026202..8027274	1073	3	q	3q.AtFBP67
At3g22720	8028961..8030100	1140	3	q	3q.AtFBP68
At3g22730	8031341..8032459	1119	3	q	3q.AtFBP69
At3g22870	8096230..8097471	1242	3	q	3q.AtFBP70
At3g22940	8131468..8132706	1239	3	q	3q.AtFBP71
At3g23260	8313334..8314575	1242	3	q	3q.AtFBP72
At3g23420	8386273..8387366	1094	3	q	3q.AtFBP73
At3g23620	8480025..8482222	2198	3	q	3q.AtFBP74
At3g23880	8621986..8623214	1229	3	q	3q.AtFBP75
At3g23950	8652908..8654164	1257	3	q	3q.AtFBP76
At3g23960	8657736..8658980	1245	3	q	3q.AtFBP77
At3g23970	8660447..8661688	1242	3	q	3q.AtFBP78
At3g24580	8969162..8970298	1137	3	q	3q.AtFBP79
At3g24610	8975366..8976575	1210	3	q	3q.AtFBP80
At3g24700	9022281..9023453	1173	3	q	3q.AtFBP81
At3g24760	9040014..9042093	2080	3	q	3q.AtFBP82
At3g25460	9231581..9232666	1086	3	q	3q.AtFBP83
At3g25550	9278878..9279587	710	3	q	3q.AtFBP84
At3g25750	9400955..9402088	1134	3	q	3q.AtFBP85
At3g26000	9506778..9509302	2525	3	q	3q.AtFBP86
At3g26010	9511901..9513316	1416	3	q	3q.AtFBP87
At3g26810	9867652..9870782	3131	3	q	3q.AtFBP88
At3g26920	9920429..9922642	2214	3	q	3q.AtFBP89
At3g27150	10009442..10011807	2366	3	q	3q.AtFBP90
At3g27290	10079462..10081533	2072	3	q	3q.AtFBP91
At3g28410	10640152..10642071	1920	3	q	3q.AtFBP92
At3g29830	11737049..11738847	1799	3	q	3q.AtFBP93
At3g30430	12064952..12065296	345	3	q	3q.AtFBP94
At3g42722	14837718..14837960	243	3	p	3p.AtFBP95
At3g42770	14867122..14870083	2962	3	p	3p.AtFBP96
At3g43710	15605608..15606744	1137	3	p	3p.AtFBP97
At3g44060	15824938..15826391	1454	3	p	3p.AtFBP98
At3g44080	15835632..15837126	1495	3	p	3p.AtFBP99
At3g44090	15839123..15840759	1637	3	p	3p.AtFBP100
At3g44120	15878399..15879830	1432	3	p	3p.AtFBP101
At3g44130	15881870..15883638	1769	3	p	3p.AtFBP102
At3g44810	16358496..16359983	1488	3	p	3p.AtFBP103
At3g46050	16916072..16917184	1113	3	p	3p.AtFBP104
At3g47020	17319862..17321077	1216	3	p	3p.AtFBP105
At3g47030	17322119..17323594	1476	3	p	3p.AtFBP106
At3g47150	17358591..17359765	1175	3	p	3p.AtFBP107
At3g48880	18126788..18129251	2464	3	p	3p.AtFBP108
At3g49020	18169079..18170660	1582	3	p	3p.AtFBP109
At3g49030	18173087..18174947	1861	3	p	3p.AtFBP110
At3g49040	18177482..18178839	1358	3	p	3p.AtFBP111
At3g49150	18218858..18220430	1573	3	p	3p.AtFBP112
At3g49450	18337305..18338542	1238	3	p	3p.AtFBP113
At3g49510	18353891..18355057	1167	3	p	3p.AtFBP114
At3g49520	18359584..18360750	1167	3	p	3p.AtFBP115
At3g49980	18530290..18531634	1345	3	p	3p.AtFBP116
At3g50080	18572624..18574548	1925	3	p	3p.AtFBP117
At3g50710	18845123..18846905	1783	3	p	3p.AtFBP118
At3g51530	19112694..19114643	1950	3	p	3p.AtFBP119
At3g52030	19301778..19304253	2476	3	p	3p.AtFBP120
At3g52320	19403020..19404192	1173	3	p	3p.AtFBP121
At3g52670	19525095..19526803	1709	3	p	3p.AtFBP122
At3g52680	19526968..19529062	2095	3	p	3p.AtFBP123
At3g53000	19653910..19656135	2226	3	p	3p.AtFBP124
At3g54460	20161942..20167326	5385	3	p	3p.AtFBP125
At3g54480	20170654..20173530	2877	3	p	3p.AtFBP126
At3g54650	20225730..20229214	3485	3	p	3p.AtFBP127
At3g55900	20742166..20742653	488	3	p	3p.AtFBP128
At3g56470	20934597..20936436	1840	3	p	3p.AtFBP129
At3g56670	20989035..20989995	961	3	p	3p.AtFBP130
At3g56780	21031303..21033403	2101	3	p	3p.AtFBP131
At3g57580	21320491..21322379	1889	3	p	3p.AtFBP132
At3g57590	21329919..21331502	1584	3	p	3p.AtFBP133
At3g58820	21752533..21754681	2149	3	p	3p.AtFBP134
At3g58860	21763720..21765306	1587	3	p	3p.AtFBP135
At3g58880	21768485..21770167	1683	3	p	3p.AtFBP136
At3g58900	21772813..21774873	2061	3	p	3p.AtFBP137
At3g58910	21775306..21776079	774	3	p	3p.AtFBP138
At3g58920	21776293..21777988	1696	3	p	3p.AtFBP139
At3g58930	21778164..21780663	2500	3	p	3p.AtFBP140
At3g58940	21780785..21783676	2892	3	p	3p.AtFBP141
At3g58950	21783989..21785840	1852	3	p	3p.AtFBP142
At3g58960	21787146..21788807	1662	3	p	3p.AtFBP143
At3g58980	21794445..21797006	2562	3	p	3p.AtFBP144
At3g59000	21799248..21801804	2557	3	p	3p.AtFBP145
At3g59150	21872831..21874422	1592	3	p	3p.AtFBP146
At3g59160	21875023..21876690	1668	3	p	3p.AtFBP147
At3g59170	21878167..21879799	1633	3	p	3p.AtFBP148
At3g59190	21884426..21886808	2383	3	p	3p.AtFBP149
At3g59200	21887123..21889423	2301	3	p	3p.AtFBP150
At3g59210	21889476..21891944	2469	3	p	3p.AtFBP151
At3g59230	21895948..21897787	1840	3	p	3p.AtFBP152
At3g59240	21898682..21900364	1683	3	p	3p.AtFBP153
At3g59250	21901570..21903284	1715	3	p	3p.AtFBP154
At3g59610	22019553..22021308	1756	3	p	3p.AtFBP155
At3g59940	22142856..22144439	1540	3	p	3p.AtFBP156
At3g60040	22175852..22179728	3877	3	p	3p.AtFBP157
At3g60350	22306488..22311244	4757	3	p	3p.AtFBP158
At3g60710	22440198..22441507	1310	3	p	3p.AtFBP159
At3g60790	22464623..22466948	2326	3	p	3p.AtFBP160
At3g61060	22602816..22604582	1767	3	p	3p.AtFBP161
At3g61340	22701034..22702530	1497	3	p	3p.AtFBP162
At3g61350	22702632..22704481	1850	3	p	3p.AtFBP163
At3g61590	22791898..22794710	2813	3	p	3p.AtFBP164
At3g61730	22848427..22850475	2049	3	p	3p.AtFBP165
At3g62230	23031531..23033146	1616	3	p	3p.AtFBP166
At3g62430	23093451..23095657	2207	3	p	3p.AtFBP167
At3g62440	23096104..23097726	1623	3	p	3p.AtFBP168
At3g62980	23273065..23276630	3566	3	p	3p.AtFBP169
At3g63220	23357328..23359291	1964	3	p	3p.AtFBP170
At4g00160	63410..65479	2070	4	p	4p.AtFBP1
At4g00315	137404..138888	1485	4	p	4p.AtFBP2
At4g00320	139939..141643	1705	4	p	4p.AtFBP3
At4g00755	324925..327008	2084	4	p	4p.AtFBP4
At4g02310	1014680..1015729	1050	4	p	4p.AtFBP5
At4g02440	1072376..1073779	1299	4	p	4p.AtFBP6
At4g02740	1217589..1221019	3431	4	p	4p.AtFBP7
At4g02760	1223959..1229014	5056	4	p	4p.AtFBP8
At4g03030	1335680..1337565	1886	4	p	4p.AtFBP9
At4g03190	1404887..1407402	2516	4	p	4p.AtFBP10
At4g03220	1417472..1419148	1677	4	p	4p.AtFBP11
At4g04690	2373999..2375135	1137	4	p	4p.AtFBP12
At4g05010	2567183..2568437	1255	4	p	4p.AtFBP13
At4g05080	2603001..2604176	1176	4	p	4p.AtFBP14
At4g05460	2760502..2762445	1944	4	p	4p.AtFBP15
At4g05470	2763211..2765351	2141	4	p	4p.AtFBP16
At4g05490	2771044..2772252	1209	4	p	4p.AtFBP17
At4g05497	2777723..2778839	1117	4	p	4p.AtFBP18
At4g05500	2780170..2782675	2506	4	p	4p.AtFBP19
At4g05620	2985051..2985449	399	4	p	4p.AtFBP20
At4g07400	4197666..4199511	1846	4	q	4q.AtFBP21
At4g08980	5758014..5760569	2556	4	q	4q.AtFBP22
At4g09190	5855176..5856327	1152	4	q	4q.AtFBP23
At4g09790	6163414..6164655	1242	4	q	4q.AtFBP24
At4g09870	6200089..6201215	1127	4	q	4q.AtFBP25
At4g09920	6224344..6226116	1773	4	q	4q.AtFBP26
At4g10190	6350928..6352031	1104	4	q	4q.AtFBP27
At4g10400	6446088..6448136	2049	4	q	4q.AtFBP28
At4g10740	6617143..6618426	1284	4	q	4q.AtFBP29
At4g10925	6702713..6704651	1939	4	q	4q.AtFBP30
At4g11580	7006648..7007738	1091	4	q	4q.AtFBP31
At4g11590	7008603..7009796	1194	4	q	4q.AtFBP32
At4g11750	7077390..7078550	1161	4	q	4q.AtFBP33
At4g11770	7082279..7083469	1191	4	q	4q.AtFBP34
At4g12560	7441681..7443775	2095	4	q	4q.AtFBP35
At4g12810	7522831..7523979	1149	4	q	4q.AtFBP36
At4g12820	7527048..7529356	2309	4	q	4q.AtFBP37
At4g13960	8060565..8063052	2488	4	q	4q.AtFBP38
At4g13965	8066138..8067576	1439	4	q	4q.AtFBP39
At4g13985	8080118..8081669	1552	4	q	4q.AtFBP40
At4g14096	8124046..8126535	2490	4	q	4q.AtFBP41
At4g14103	8126687..8128833	2147	4	q	4q.AtFBP42
At4g14905	8526311..8528010	1700	4	q	4q.AtFBP43
At4g15060	8599035..8601761	2727	4	q	4q.AtFBP44
At4g15475	8845812..8848869	3058	4	q	4q.AtFBP45
At4g17200	9651108..9652253	1146	4	q	4q.AtFBP46
At4g17565	9782508..9783644	1137	4	q	4q.AtFBP47
At4g17780	9880259..9881455	1197	4	q	4q.AtFBP48
At4g18380	10157807..10159748	1942	4	q	4q.AtFBP49
At4g19330	10557354..10558505	1152	4	q	4q.AtFBP50
At4g19865	10780892..10782448	1557	4	q	4q.AtFBP51
At4g19870	10782546..10784327	1782	4	q	4q.AtFBP52
At4g19930	10803558..10804853	1296	4	q	4q.AtFBP53
At4g19940	10806195..10807532	1338	4	q	4q.AtFBP54
At4g21240	11322411..11323664	1254	4	q	4q.AtFBP55
At4g21510	11445849..11447429	1581	4	q	4q.AtFBP56
At4g22030	11672349..11673748	1400	4	q	4q.AtFBP57
At4g22060	11687595..11689021	1427	4	q	4q.AtFBP58
At4g22165	11734328..11735419	1092	4	q	4q.AtFBP59
At4g22170	11736472..11737767	1296	4	q	4q.AtFBP60
At4g22180	11738511..11739782	1272	4	q	4q.AtFBP61
At4g22390	11813313..11815164	1852	4	q	4q.AtFBP62
At4g22660	11914981..11916171	1193	4	q	4q.AtFBP63
At4g23580	12304246..12305397	1152	4	q	4q.AtFBP64
At4g23960	12444765..12445904	1140	4	q	4q.AtFBP65
At4g24210	12563279..12564482	1204	4	q	4q.AtFBP66
At4g24390	12613076..12616238	3163	4	q	4q.AtFBP67
At4g25710	13098102..13099625	1524	4	q	4q.AtFBP68
At4g26340	13324130..13325590	1461	4	q	4q.AtFBP69
At4g26350	13326853..13328315	1463	4	q	4q.AtFBP70
At4g27050	13575671..13578061	2391	4	q	4q.AtFBP71
At4g29370	14455602..14456852	1251	4	q	4q.AtFBP72
At4g29420	14470456..14472300	1845	4	q	4q.AtFBP73
At4g29970	14662765..14663917	1153	4	q	4q.AtFBP74
At4g30640	14952591..14953849	1259	4	q	4q.AtFBP75
At4g33160	15993957..15995685	1729	4	q	4q.AtFBP76
At4g33210	16015640..16021230	5591	4	q	4q.AtFBP77
At4g33290	16049573..16050865	1293	4	q	4q.AtFBP78
At4g33900	16251572..16252711	1140	4	q	4q.AtFBP79
At4g34170	16368087..16369025	939	4	q	4q.AtFBP80
At4g35120	16716806..16718017	1212	4	q	4q.AtFBP81
At4g35470	16846138..16849183	3046	4	q	4q.AtFBP82
At4g38870	18132301..18133863	1563	4	q	4q.AtFBP83
At4g38940	18152692..18154132	1441	4	q	4q.AtFBP84
At4g39060	18202607..18204634	2028	4	q	4q.AtFBP85
At4g39240	18269150..18270800	1638	4	q	4q.AtFBP86
At4g39290	18285205..18286302	1098	4	q	4q.AtFBP87
At4g39550	18380482..18381945	1464	4	q	4q.AtFBP88
At4g39560	18382259..18383885	1627	4	q	4q.AtFBP89
At4g39570	18384000..18385548	1549	4	q	4q.AtFBP90
At4g39580	18385684..18386811	1128	4	q	4q.AtFBP91
At4g39590	18387331..18388759	1429	4	q	4q.AtFBP92
At4g39600	18388890..18390797	1908	4	q	4q.AtFBP93
At4g39750	18439138..18439578	441	4	q	4q.AtFBP94
At4g39753	18440112..18441445	1334	4	q	4q.AtFBP95
At4g39756	18441756..18443000	1245	4	q	4q.AtFBP96
At4g39760	18443679..18444788	1110	4	q	4q.AtFBP97
At5g01720	266278..270646	4369	5	p	5p.AtFBP1
At5g02700	609381..611747	2367	5	p	5p.AtFBP2
At5g02910	677031..679263	2233	5	p	5p.AtFBP3
At5g02920	680492..681777	1286	5	p	5p.AtFBP4
At5g02930	682411..684480	2070	5	p	5p.AtFBP5
At5g02980	697993..699000	1008	5	p	5p.AtFBP6
At5g02990	700169..700951	783	5	p	5p.AtFBP7
At5g03000	703268..704437	1170	5	p	5p.AtFBP8
At5g03020	707205..708396	1140	5	p	5p.AtFBP9
At5g03100	726779..728855	2077	5	p	5p.AtFBP10
At5g03970	1071498..1073489	1992	5	p	5p.AtFBP11
At5g04010	1080105..1081096	992	5	p	5p.AtFBP12
At5g06550	2001071..2003112	2042	5	p	5p.AtFBP13
At5g07610	2406068..2407330	1263	5	p	5p.AtFBP14
At5g07670	2430146..2432231	2086	5	p	5p.AtFBP15
At5g10340	3253122..3255045	1924	5	p	5p.AtFBP16
At5g14160	4567333..4568467	1135	5	p	5p.AtFBP17
At5g15620	5082465..5084136	1672	5	p	5p.AtFBP18
At5g15660	5095652..5097041	1390	5	p	5p.AtFBP19
At5g15670	5099595..5100407	813	5	p	5p.AtFBP20
At5g15710	5122428..5124947	2520	5	p	5p.AtFBP21
At5g16285	5332830..5333102	273	5	p	5p.AtFBP22
At5g18160	6002770..6003909	1140	5	p	5p.AtFBP23
At5g18680	6228163..6230630	2468	5	p	5p.AtFBP24
At5g18770	6261311..6263721	2411	5	p	5p.AtFBP25
At5g18780	6264245..6266174	1930	5	p	5p.AtFBP26
At5g21040	7144829..7147277	2449	5	p	5p.AtFBP27
At5g22610	7515217..7516976	1760	5	p	5p.AtFBP28
At5g22660	7536236..7538052	1817	5	p	5p.AtFBP29
At5g22670	7538192..7539685	1494	5	p	5p.AtFBP30
At5g22700	7545481..7549393	3913	5	p	5p.AtFBP31
At5g22720	7549565..7551174	1610	5	p	5p.AtFBP32
At5g22730	7551364..7553537	2174	5	p	5p.AtFBP33
At5g24040	8125949..8127346	1398	5	p	5p.AtFBP34
At5g24560	8402205..8403486	1282	5	p	5p.AtFBP35
At5g25290	8778592..8779839	1248	5	p	5p.AtFBP36
At5g25300	8780258..8783093	2836	5	p	5p.AtFBP37
At5g25350	8794252..8797349	3098	5	p	5p.AtFBP38
At5g25850	9014082..9015917	1836	5	p	5p.AtFBP39
At5g25860	9016908..9018424	1517	5	p	5p.AtFBP40
At5g26960	9484658..9486365	1708	5	p	5p.AtFBP41
At5g27750	9828229..9830259	2031	5	p	5p.AtFBP42
At5g27920	9941734..9944942	3209	5	p	5p.AtFBP43
At5g28160	10137926..10139013	1088	5	p	5p.AtFBP44
At5g28180	10162783..10163943	1161	5	p	5p.AtFBP45
At5g35995	14136394..14138647	2254	5	q	5q.AtFBP46
At5g36000	14139940..14141892	1953	5	q	5q.AtFBP47
At5g36200	14244106..14246296	2191	5	q	5q.AtFBP48
At5g36730	14436317..14437549	1233	5	q	5q.AtFBP49
At5g36820	14495617..14496849	1233	5	q	5q.AtFBP50
At5g37040	14639135..14639934	800	5	q	5q.AtFBP51
At5g38270	15289032..15290252	1221	5	q	5q.AtFBP52
At5g38386	15362774..15364815	2042	5	q	5q.AtFBP53
At5g38390	15366011..15368053	2043	5	q	5q.AtFBP54
At5g38396	15373094..15374726	1633	5	q	5q.AtFBP55
At5g38565	15444310..15446297	1988	5	q	5q.AtFBP56
At5g38570	15449279..15450601	1323	5	q	5q.AtFBP57
At5g38590	15451910..15453928	2019	5	q	5q.AtFBP58
At5g38670	15475786..15476871	1086	5	q	5q.AtFBP59
At5g38680	15477324..15479040	1717	5	q	5q.AtFBP60
At5g38810	15540484..15541540	1057	5	q	5q.AtFBP61
At5g39250	15724477..15727206	2730	5	q	5q.AtFBP62
At5g39450	15785717..15788150	2434	5	q	5q.AtFBP63
At5g39460	15788289..15790004	1716	5	q	5q.AtFBP64
At5g39470	15791952..15793062	1111	5	q	5q.AtFBP65
At5g39480	15801635..15803341	1707	5	q	5q.AtFBP66
At5g39490	15805808..15807508	1701	5	q	5q.AtFBP67
At5g39560	15841692..15843169	1478	5	q	5q.AtFBP68
At5g40050	16032083..16033551	1469	5	q	5q.AtFBP69
At5g40680	16288754..16290001	1248	5	q	5q.AtFBP70
At5g41490	16600445..16601608	1164	5	q	5q.AtFBP71
At5g41500	16604002..16605213	1212	5	q	5q.AtFBP72
At5g41510	16607124..16608326	1203	5	q	5q.AtFBP73
At5g41630	16650282..16651835	1554	5	q	5q.AtFBP74
At5g41720	16683165..16683942	778	5	q	5q.AtFBP75
At5g41840	16754436..16756263	1828	5	q	5q.AtFBP76
At5g42350	16931531..16934031	2501	5	q	5q.AtFBP77
At5g42360	16936000..16938525	2526	5	q	5q.AtFBP78
At5g42430	16971312..16972499	1188	5	q	5q.AtFBP79
At5g42460	16979773..16981195	1423	5	q	5q.AtFBP80
At5g43190	17340071..17341814	1744	5	q	5q.AtFBP81
At5g44220	17810477..17811364	888	5	q	5q.AtFBP82
At5g44490	17923852..17925843	1992	5	q	5q.AtFBP83
At5g44940	18149369..18150892	1524	5	q	5q.AtFBP84
At5g44950	18151665..18153164	1500	5	q	5q.AtFBP85
At5g44960	18153852..18155391	1540	5	q	5q.AtFBP86
At5g44970	18155837..18157340	1504	5	q	5q.AtFBP87
At5g44980	18160204..18162264	2061	5	q	5q.AtFBP88
At5g45360	18384489..18386871	2383	5	q	5q.AtFBP89
At5g46170	18714864..18717031	2168	5	q	5q.AtFBP90
At5g47300	19198125..19199375	1251	5	q	5q.AtFBP91
At5g48170	19532270..19533390	1121	5	q	5q.AtFBP92
At5g48980	19860708..19862052	1345	5	q	5q.AtFBP93
At5g48990	19862235..19863975	1741	5	q	5q.AtFBP94
At5g49000	19864410..19865825	1416	5	q	5q.AtFBP95
At5g49610	20131274..20132744	1471	5	q	5q.AtFBP96
At5g49980	20333897..20336671	2775	5	q	5q.AtFBP97
At5g50220	20446068..20447200	1133	5	q	5q.AtFBP98
At5g50270	20457487..20458996	1510	5	q	5q.AtFBP99
At5g50450	20543225..20544857	1633	5	q	5q.AtFBP100
At5g51000	20742533..20743669	1137	5	q	5q.AtFBP101
At5g51250	20830743..20831849	1107	5	q	5q.AtFBP102
At5g51370	20872719..20874349	1631	5	q	5q.AtFBP103
At5g51380	20875832..20877989	2158	5	q	5q.AtFBP104
At5g52120	21176377..21180474	4098	5	q	5q.AtFBP105
At5g52460	21292375..21293758	1384	5	q	5q.AtFBP106
At5g52610	21346423..21347478	1056	5	q	5q.AtFBP107
At5g52620	21348554..21349681	1128	5	q	5q.AtFBP108
At5g52880	21431778..21433794	2017	5	q	5q.AtFBP109
At5g53640	21789919..21790690	772	5	q	5q.AtFBP110
At5g53840	21859148..21860672	1525	5	q	5q.AtFBP111
At5g54820	22269859..22271777	1919	5	q	5q.AtFBP112
At5g55150	22382202..22383392	1191	5	q	5q.AtFBP113
At5g56180	22737325..22741100	3776	5	q	5q.AtFBP114
At5g56370	22835931..22837972	2042	5	q	5q.AtFBP115
At5g56390	22842790..22844273	1484	5	q	5q.AtFBP116
At5g56400	22846069..22847615	1547	5	q	5q.AtFBP117
At5g56410	22848508..22850331	1824	5	q	5q.AtFBP118
At5g56420	22850584..22852753	2170	5	q	5q.AtFBP119
At5g56430	22853323..22854801	1479	5	q	5q.AtFBP120
At5g56440	22855742..22857117	1376	5	q	5q.AtFBP121
At5g56560	22899724..22901985	2262	5	q	5q.AtFBP122
At5g56570	22902736..22904596	1861	5	q	5q.AtFBP123
At5g56690	22939723..22941099	1377	5	q	5q.AtFBP124
At5g56700	22941750..22943587	1838	5	q	5q.AtFBP125
At5g56810	22974363..22976112	1750	5	q	5q.AtFBP126
At5g56820	22976334..22977838	1505	5	q	5q.AtFBP127
At5g57360	23241320..23244590	3271	5	q	5q.AtFBP128
At5g57900	23449694..23450933	1240	5	q	5q.AtFBP129
At5g60060	24188483..24189765	1283	5	q	5q.AtFBP130
At5g60560	24345949..24347172	1224	5	q	5q.AtFBP131
At5g60570	24347783..24350164	2382	5	q	5q.AtFBP132
At5g60610	24363591..24365615	2025	5	q	5q.AtFBP133
At5g62060	24927688..24928698	1011	5	q	5q.AtFBP134
At5g62510	25095373..25096635	1263	5	q	5q.AtFBP135
At5g62660	25156326..25157465	1140	5	q	5q.AtFBP136
At5g62970	25272033..25273537	1505	5	q	5q.AtFBP137
At5g63520	25425950..25429255	3306	5	q	5q.AtFBP138
At5g65850	26346266..26347610	1345	5	q	5q.AtFBP139
At5g66830	26691253..26692689	1437	5	q	5q.AtFBP140
At5g67140	26793880..26795369	1490	5	q	5q.AtFBP141
At5g67250	26831185..26833903	2719	5	q	5q.AtFBP142
Note:	The Arabidopsis FBP genes data is retrieved from two different studies (i.e. Kuroda et al., 2002 and Xu et al., 2009), and reanalysis resulted in the collection of 703 genes.
	The genes, which are obsolete now, are removed from the data.
